# Supplementary material
Source: publisher site journal article supplement (https://www.dovepress.com/article/404620)
Supplement: Supplementary file 1 [file get_supplementary_file.php]

## Supplementary material: Standard Questionnaire

## Questionnaire

1. Social demographic information
2. What is your sub county?
3. Itek
4. Lira
5. Ogur
6. What is your gender?
7. Female
8. Male
9. What is the age your child?
10. Below 12 years
11. Between 12 and 15 years
12. Between 16 and 18 years.
13. What is your highest education level?
14. No formal education
15. Completed Primary
16. Completed Secondary
17. Post-secondary
18. What is your marital status?
19. Singles
20. Married
21. Widowed/Divorced
22. Which religion are you affiliated to?
23. Christians
24. Muslims
25. Unidentified
26. What is your vaccination status?
27. Vaccinated
28. Not vaccinated
29. Does COVID-19 have an adverse effect?
30. Yes
31. No
32. Family/friends with previous COVID-19 diagnosis
33. Yes
34. No
35. I fear my children may spread COVID-19 to the family members
36. Yes
37. No
38. Do you live with elderly people or vulnerable groups during the COVID-19 pandemic?
39. Yes
40. No
41. Do you trust the vaccines?
42. Yes
43. No
44. The following statements refer to all infectious diseases for which a vaccination is available and recommended by health authorities. Please state how much you agree with each of the statements. Rate the statements from 1 = “strongly disagree” to 7 = “strongly agree”.

| **Items** | **1** | **2** | **3** | **4** | **5** | **6** | **7** |
| --- | --- | --- | --- | --- | --- | --- | --- |
| 1. I am convinced the appropriate authorities only allow effective and safe COVID-19 vaccines for children. |  |  |  |  |  |  |  |
| 2. I will get my child vaccinated because it is too risky for him/her to get infected with COVID-19 |  |  |  |  |  |  |  |
| 3. Vaccination against COVID-19 is so important to me that I prioritize my child getting vaccinated over other things. |  |  |  |  |  |  |  |
| 4. I will only get my child vaccinated against COVID-19 when the benefits clearly outweigh the risks. |  |  |  |  |  |  |  |
| 5. I see child vaccinations as a collective task against the spread of COVID-19 |  |  |  |  |  |  |  |
| 6. It should be possible to sanction parents who do not follow the vaccination recommendations by health authorities. |  |  |  |  |  |  |  |
| 7. Vaccinations against COVID-19 cause diseases and allergies in children that are more serious than COVID-19. |  |  |  |  |  |  |  |
